# Supplementary material for: Surfactant-free aqueous preparation from a star polymer of size-controlled nanoparticles with encapsulated functional molecules
Source: Royal Society of Chemistry journal article supplement (doi:10.1039/c5ra12205h), 2015-01-01
Supplement: c5ra12205h1.pdf [file c5ra12205h1.pdf]

## Electronic Supplementary Information for:

Surfactant-free aqueous preparation from a star  
polymer of size-controlled nanoparticles with  
encapsulated functional molecules

*Yuka Shibata, Tomofumi Santa and Masaru Kato\**

Graduate School of Pharmaceutical Sciences and  
GPLLI Program, The University of Tokyo,  
7-3-1 Hongo, Bunkyo-ku, Tokyo 113-0033, Japan.

\* To whom corresponding should be addressed:  
E-mail: [masaru-kato@umin.ac.jp](mailto:masaru-kato@umin.ac.jp)

**Supporting Figure 1** DLS analyses of nanoparticles prepared using different vortex conditions after the removal of oxygen.

**Supporting Figure 2** Relationship between the amount of trypsin used in the preparation solution and its activity when released upon irradiation.

0 day  
1 week  
2 week

**Supporting Figure 3** DLS analyses of nanoparticles stored for different durations at 4°C.
